# Supplementary material for: Host Cell Redox Alterations Promote Latent HIV-1 Reactivation through Atypical Transcription Factor Cooperativity
Source: MDPI journal article supplement (doi:10.3390/v14102288), 2022-10-18
Supplement: s1 [file s1]

# Supplemental Material

## Supplemental figures

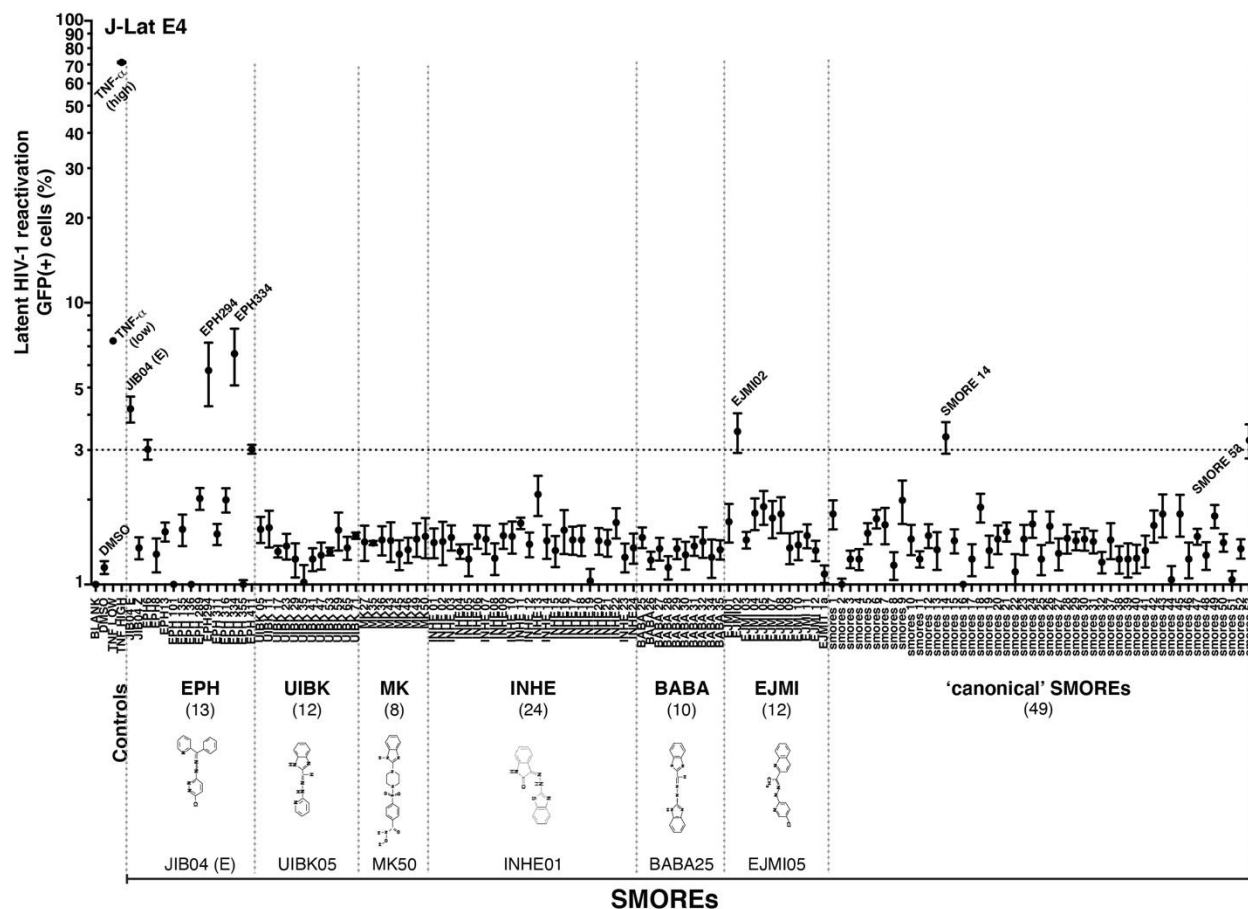

**Supplementary Fig. S1. SMOREs screen in J-Lat E4 cell model of latency**

J-Lat E4 cells were treated as indicated in the text and latent HIV-1 reactivation measured by flow cytometry to assess levels of GFP expression. The number of compounds per group is indicated in brackets and representative chemical structures of one compound per group are shown. The dashed line differentiates compounds that activate more than 3-fold over control samples (DMSO) compared to those that do not activate or activate less than 3-fold. TNF- $\alpha$  high (10 ng/mL) or low (1 ng/mL) concentrations were used as positive controls to gauge the dynamic range of the response. The percentage of GFP positive cells from three independent runs is indicated (mean  $\pm$  SEM; n = 3).

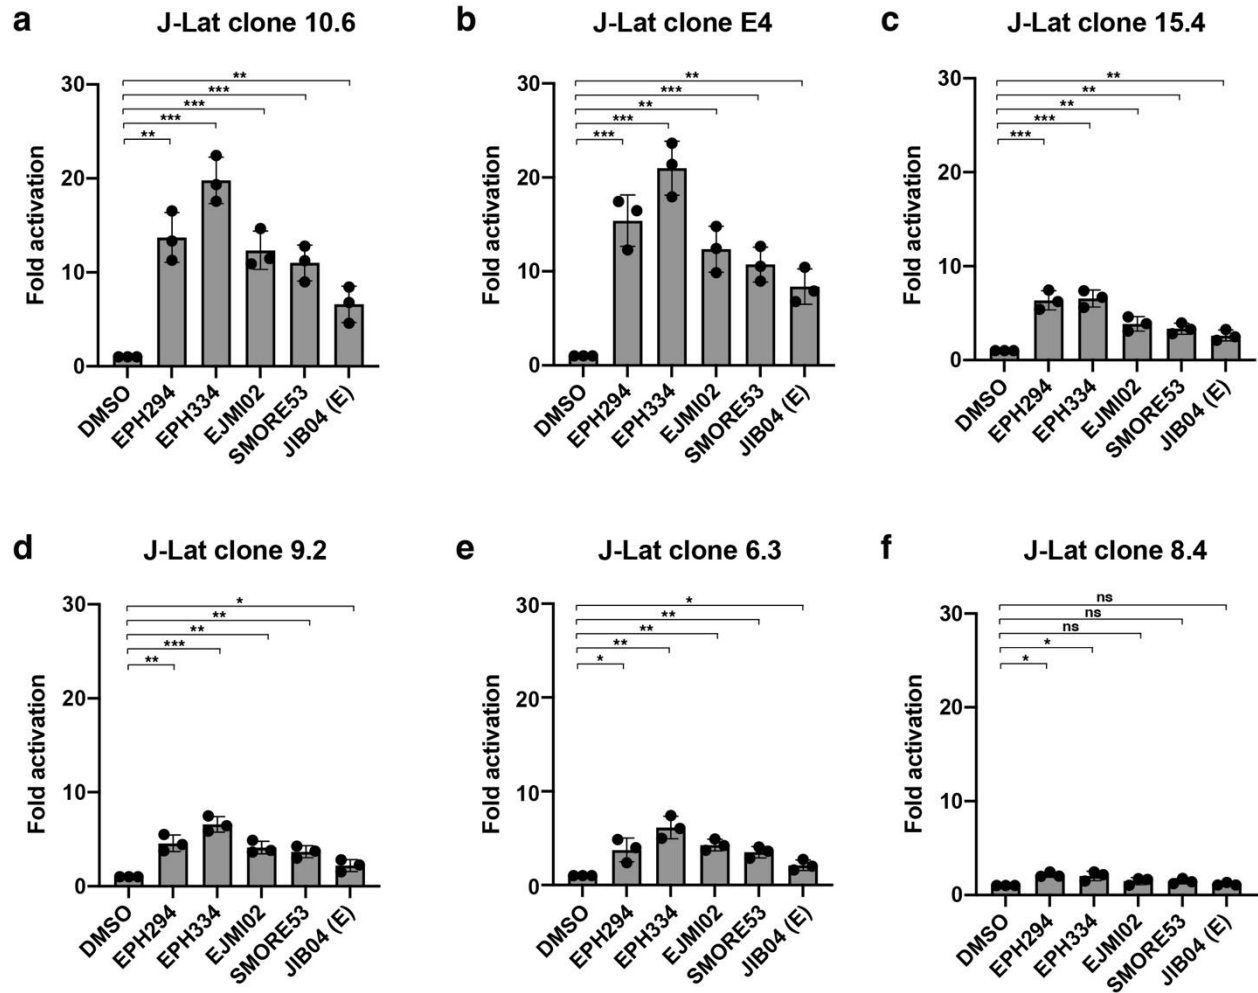

**Supplementary Fig. S2. SMOREs reactivate latent HIV-1 from several euchromatin cell models of latency**

**a-f)** Various J-Lat cell models were treated with the indicated SMOREs (1  $\mu$ M) for 24 hrs and RNA isolated for RT-qPCR for quantitation of HIV-1 RNAs (VQA amplicon) normalized to *RPL 19* (mean  $\pm$  SEM; n = 3). P-values (\* $P$  < 0.05, \*\* $P$  < 0.01, \*\*\* $P$  < 0.001) were determined by unpaired Student's t test.  $P$  < 0.05 was considered statistically significant.

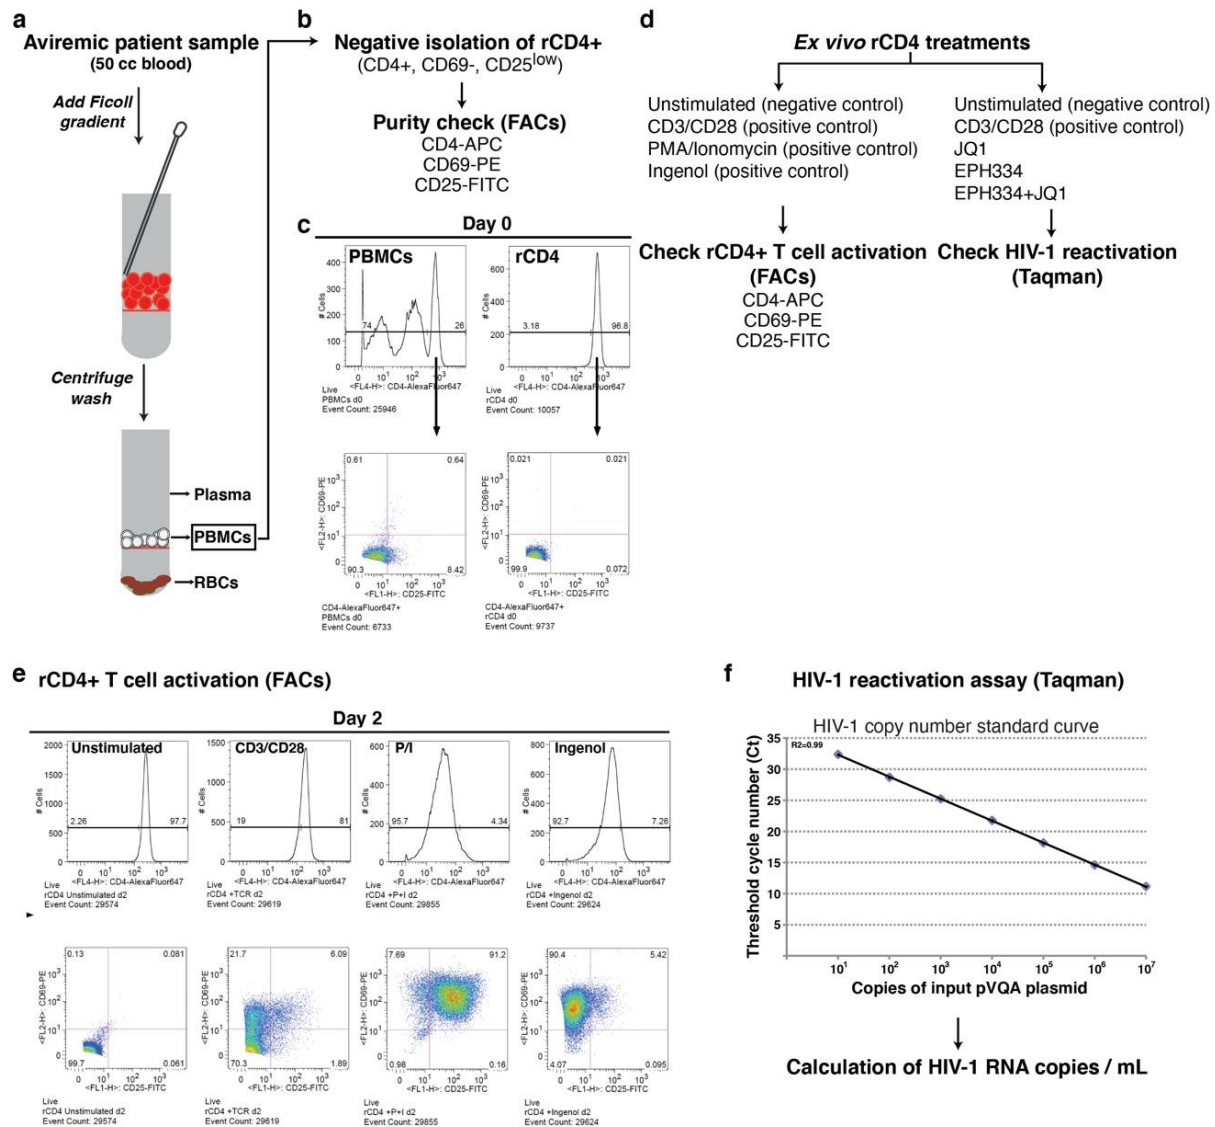

**Supplementary Fig. S3. Purification and ex vivo treatment of patient-derived resting CD4<sup>+</sup> T cells for latent HIV-1 reactivation assays**

**a-b)** Schemes depicting the steps of resting (rCD4<sup>+</sup>) T cell isolation from aviremic patient samples and markers used for purity check.

**c)** Flow cytometry measurement of CD4-APC (top), and CD69-PE and CD25-FITC (bottom) in PBMCs and rCD4<sup>+</sup> T cells.

**d)** Scheme depicting the ex vivo treatments performed on the rCD4<sup>+</sup> T cells.

**e)** Flow cytometry measurement of rCD4<sup>+</sup> T cell activation ex vivo 48 hrs post-stimulation.

**f)** HIV-1 copy number standard curve obtained through Taqman assays to measure HIV-1 RNA copies / mL of supernatant in patient samples of panel (e).

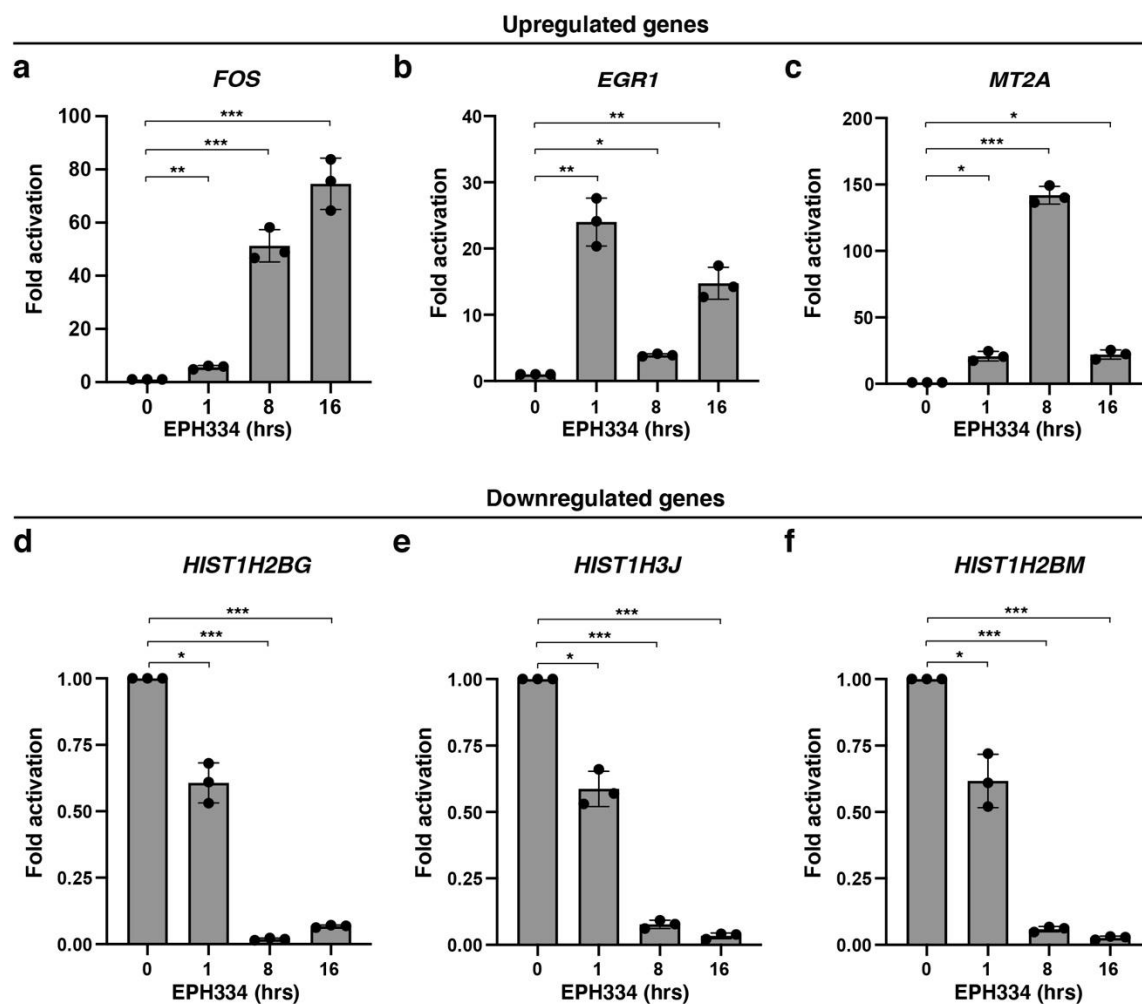

**Supplementary Fig. S4. RNA-seq validation using RT-qPCR assays in J-Lat 10.6 cell model of latency**

**a-c)** Quantitation of three upregulated genes from the RNA-seq dataset of Fig. 3 in response to a temporal EPH334 (2.5  $\mu$ M) treatment and normalized to *U6* by RT-qPCR (mean  $\pm$  SEM;  $n = 3$ ). P-values ( $*P < 0.05$ ,  $**P < 0.01$ ,  $***P < 0.001$ ) were determined by unpaired Student's t test.  $P < 0.05$  was considered statistically significant.

**d-f)** Quantitation of three downregulated genes from the RNA-seq dataset of Fig. 3 in response to a temporal EPH334 (2.5  $\mu$ M) treatment and normalized to *U6* by RT-qPCR (mean  $\pm$  SEM;  $n = 3$ ). P-values ( $*P < 0.05$ ,  $**P < 0.01$ ,  $***P < 0.001$ ) were determined by unpaired Student's t test.  $P < 0.05$  was considered statistically significant.

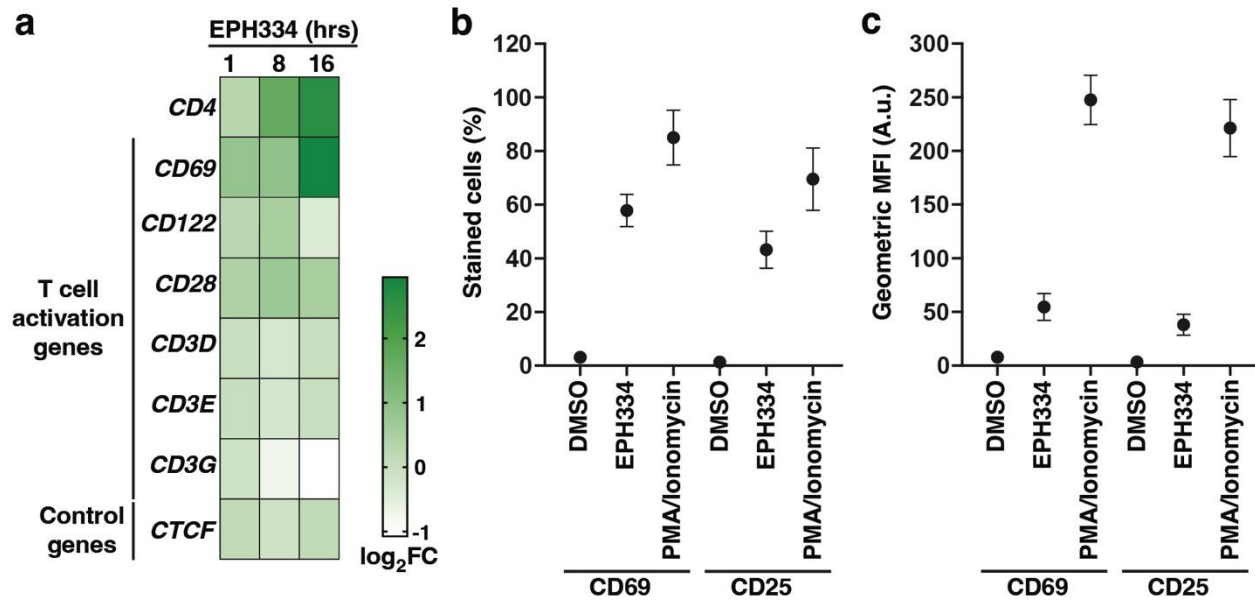

**Supplementary Fig. S5. Expression of T cell activation genes in CD4<sup>+</sup> T immortalized and primary cells in response to EPH334 treatment**

**a)** Heatmap showing the log<sub>2</sub>FC expression of the indicated genes in the J-Lat 10.6 cell model of latency treated with EPH334 (2.5  $\mu$ M) for the indicated time points from the RNA-seq dataset of Fig. 3. CD25 was induced with EPH334; however, it was undetectable in untreated cells (0 read counts), thus hindering calculation of fold induction upon EPH334 treatment.

**b)** Flow cytometry measurement of the percentage (%) of stained cells for the indicated cell surface markers in resting memory CD4<sup>+</sup> T cells treated with DMSO (vehicle control), EPH334 (2.5  $\mu$ M) or PMA/Ionomycin (10 ng/mL PMA and 0.1  $\mu$ M Ionomycin) for 24 hrs. The percentage of positive cells from three independent runs from one representative donor is indicated (mean  $\pm$  SEM; n = 3). Staining with isotype controls antibodies was done as negative control and revealed no staining.

**c)** Flow cytometry measurement of the geometric mean fluorescence intensity (MFI) of the samples of panel b). A.u. denotes arbitrary units.

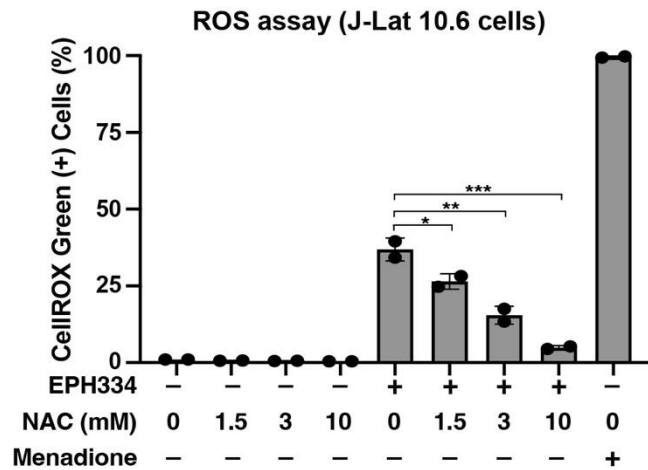

**Supplementary Fig. S6. Dose-dependent N-Acetylcysteine-mediated EPH334-induced ROS inhibition in J-Lat 10.6 cell model of latency**

Measurement of oxidative stress in J-Lat 10.6 cells pre-treated for 2 hrs with increasing concentrations of N-Acetylcysteine (NAC) and then treated with vehicle (DMSO) or EPH334 (2.5  $\mu$ M) for 1 hr as judged based on the percentage of CellROX Green Dye positive cells determined by flow cytometry ( $n = 2$ ). Excess Menadione (100  $\mu$ M) was used as a positive ROS inducer control. P-values (\* $P < 0.05$ , \*\* $P < 0.01$ , \*\*\* $P < 0.001$ , ns = not significant) were determined by unpaired Student's t test.  $P < 0.05$  was considered statistically significant.

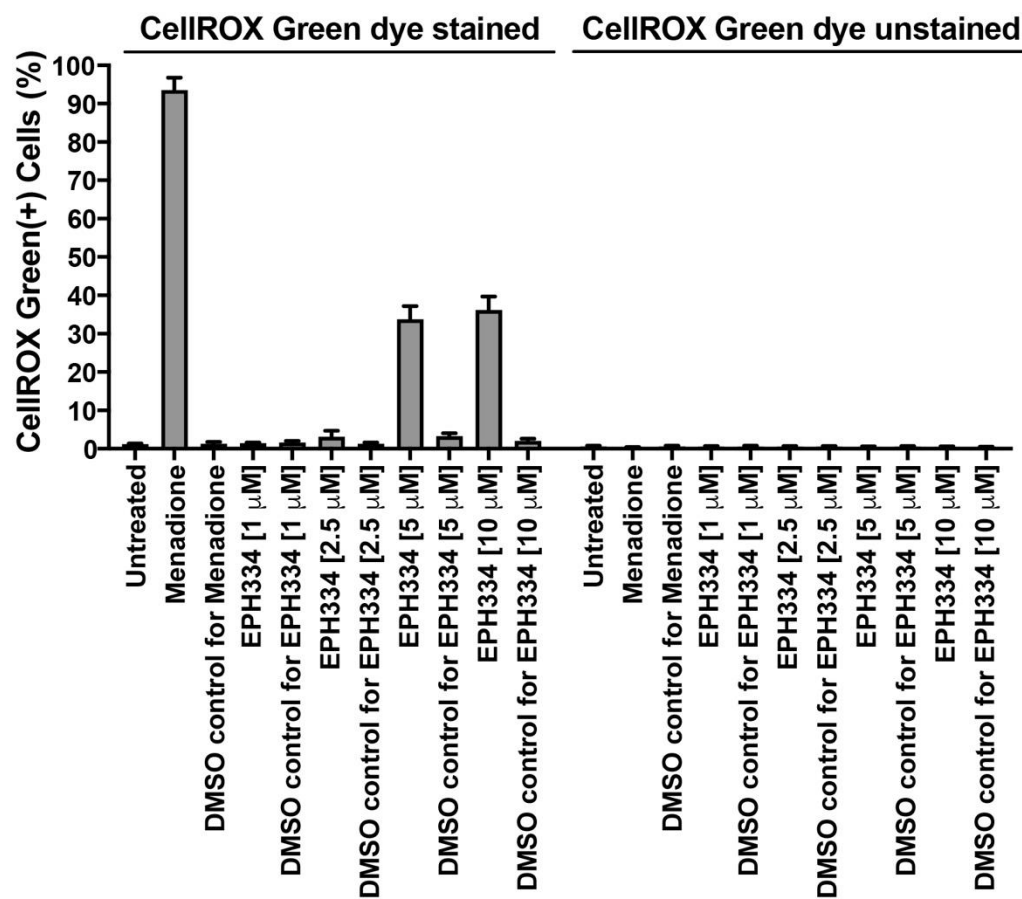

**Supplementary Fig. S7. Measurement of oxidative stress derives from staining cells with the CellIROX Green dye and not from GFP encoded from the provirus integrated into J-Lat 10.6 cells**

Measurement of oxidative stress in J-Lat 10.6 cells treated with vehicle (DMSO), Menadione (100  $\mu$ M) or EPH334 (1, 2.5, 5 and 10  $\mu$ M) for 1 hr and then stained or not with CellIROX Green Dye followed by flow cytometry analysis (n = 3). Excess Menadione (100  $\mu$ M) was used as a positive ROS inducer control.

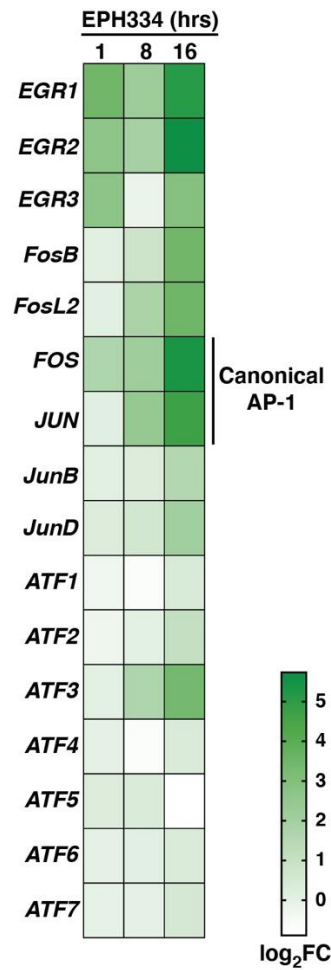

**Supplementary Fig. S8. Heatmap of immediate early gene expression in J-Lat 10.6 cell model of latency in response to a temporal EPH334 treatment**

log<sub>2</sub>FC expression of the indicated genes in J-Lat 10.6 cells treated with EPH334 (2.5  $\mu$ M) for the indicated time points from the RNA-seq dataset of Fig. 3. The expression of *FOS* and *JUN* encoding the canonical AP-1 subunits (c-Fos and c-Jun, respectively) is indicated.



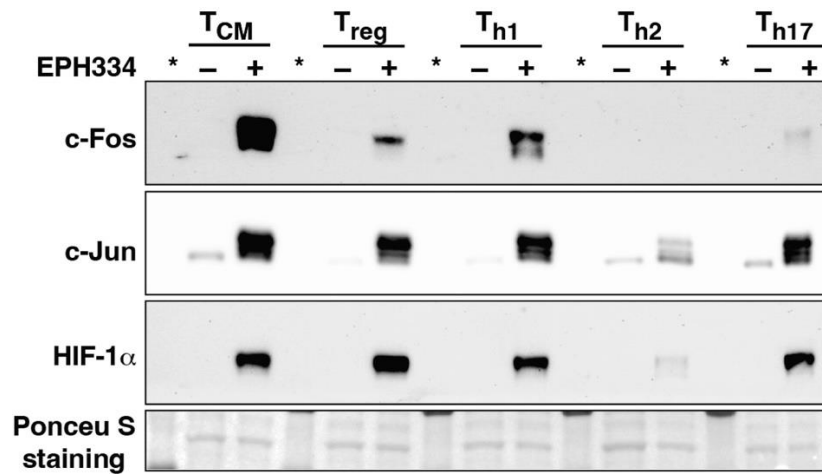

**Supplementary Fig. S9. EPH334 induces the redox-responsive master regulators in primary resting CD4<sup>+</sup> T cells**

Western blots of primary resting CD4<sup>+</sup> T cell subsets (T<sub>CM</sub>, T<sub>reg</sub>, Th1, Th2, and Th17) showing EPH334 (2.5  $\mu$ M) treatment for 2 hrs induces c-Fos, c-Jun, and HIF-1 $\alpha$ . DMSO (-) was used as vehicle control. Total protein loaded on the gels was revealed by Ponceau S staining. The asterisks (\*) denote the presence of a molecular weight ladder separating the indicated lines.

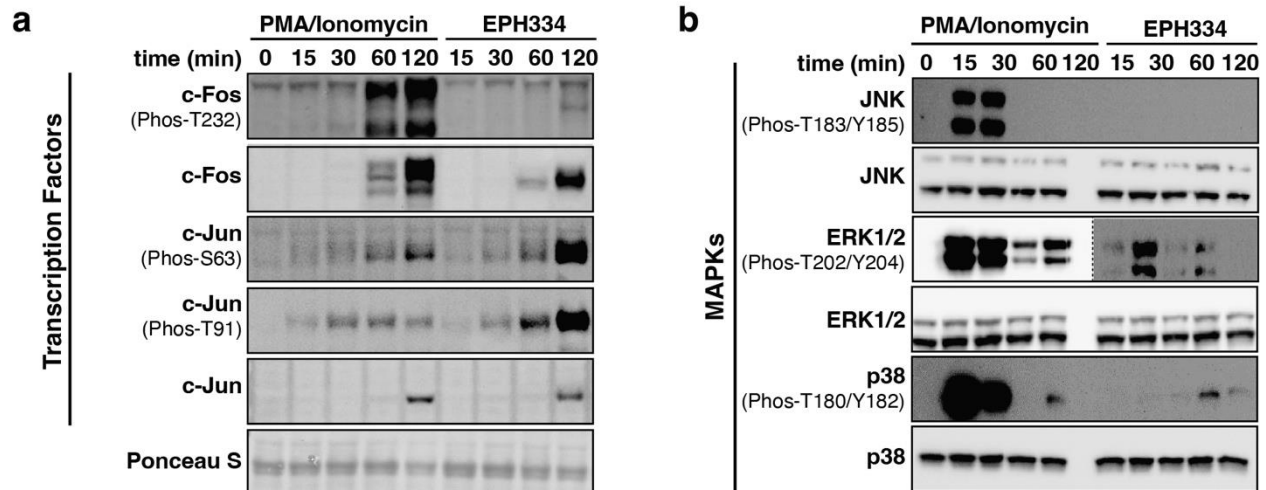

**Supplementary Fig. S10. Comparison of PMA/Ionomycin and EPH334 induced AP-1 induction and phosphorylation, and MAPK activation**

**a)** Western blots of J-Lat 10.6 cells treated with the indicated small molecules (EPH334, 2.5  $\mu$ M; PMA, 10 ng/mL) and probed with the indicated antibodies. Total protein loaded was revealed by Ponceau S staining.

**b)** Western blots of J-Lat 10.6 cells treated with the indicated small molecules (EPH334, 2.5  $\mu$ M; PMA, 10 ng/mL) and probed with the indicated antibodies. Total protein loaded was revealed by Ponceau S staining. The dashed line indicates the blot was cropped to allow detection of phosphorylated ERK1/2 in both drug treatments because PMA/Ionomycin is a more potent inducer than EPH334. Total JNK, ERK1/2 and p38 serve as internal loading controls as their levels remain unchanged with the treatments.

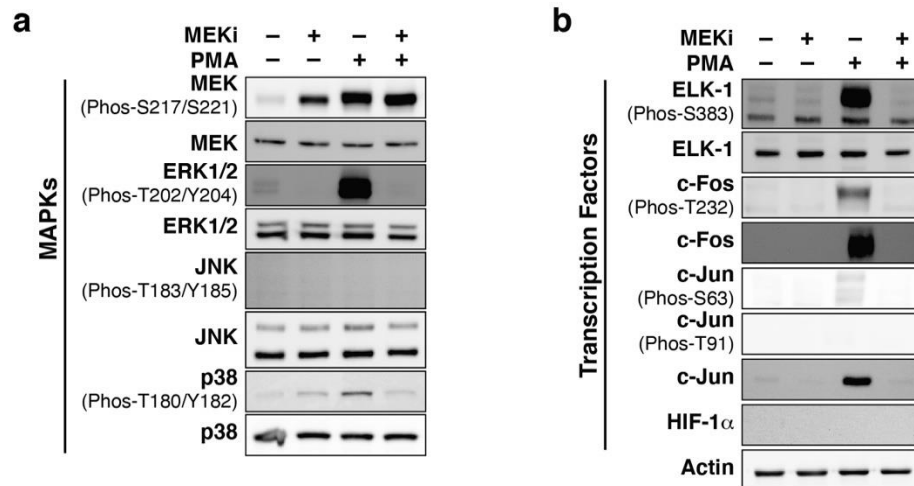

**Supplementary Fig. S11. MEK inhibition dampens PMA-induced ERK1/2 phosphorylation, ELK-1 phosphorylation and c-Fos and c-Jun synthesis and phosphorylation**

**a)** Western blots of J-Lat 10.6 cells pre-treated for 1 hr with MEKi (PD0325901, 1  $\mu$ M) or vehicle control (tissue culture media) and then treated for 15 min with PMA (10 ng/mL) or vehicle control (DMSO) and probed with the indicated antibodies.

**b)** Western blots of J-Lat 10.6 cells pre-treated for 1 hr with MEKi (PD0325901, 1  $\mu$ M) or vehicle control (tissue culture media) and then treated for 8 hrs with PMA (10 ng/mL) or vehicle control (DMSO) and probed with the indicated antibodies.

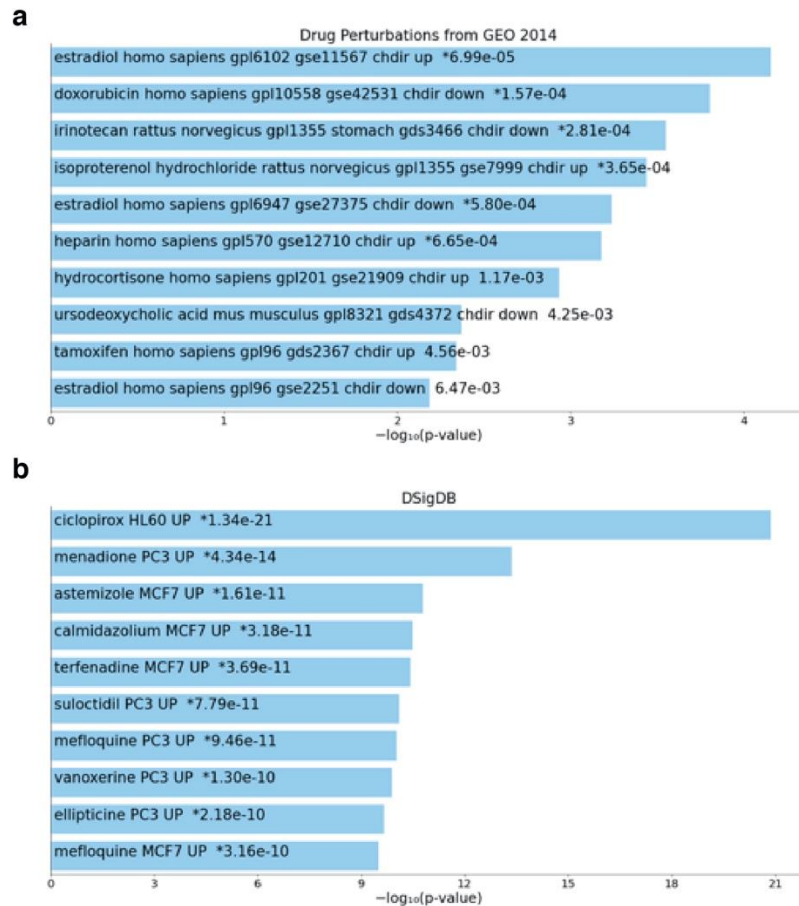

**Supplementary Fig. S12. Enrichment of small compounds related to EPH334 through transcriptome profiling analysis with Enrichr**

**a)** Drug perturbations from GEO 2014 enriched in J-Lat 10.6 cells after 1 hr EPH334 (2.5  $\mu$ M) treatment from Fig. 3 alongside their adjusted p-values.

**b)** Drug Signatures Database (DSigDB) enriched in J-Lat 10.6 cells after 1 hr EPH334 (2.5  $\mu$ M) treatment from Fig. 3 alongside their adjusted p-values.

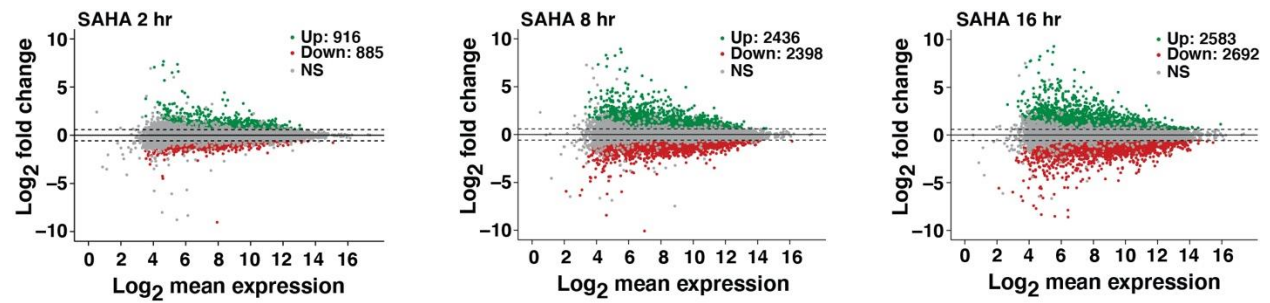

**Supplementary Fig. S13. Transcriptional profiling reveals the HDAC inhibitor SAHA induces immediate early genes and a redox-responsive program**

Scatterplots of differentially expressed genes identified by RNA-seq of J-Lat 10.6 cells treated with SAHA (1  $\mu$ M) for the indicated time points ( $n = 3$ , false discovery rate [FDR] < 0.05). The number of upregulated (Up), downregulated (Down), and not statistically significant (NS) genes is indicated in each plot. See Supplementary Table 3 for complete list of differentially expressed genes.

## Supplemental Tables

**Supplementary Table S1. DESeq analysis and list of differentially expressed genes in J-Lat 10.6 cells in response to EPH334 treatment.** See attached excel spreadsheet.

**Supplementary Table S2. Gene Ontology analysis of differentially expressed genes from Supplementary Table S1.** See attached excel spreadsheet.

**Supplementary Table S3. DESeq analysis and list of differentially expressed genes in J-Lat 10.6 cells in response to SAHA treatment.** See attached excel spreadsheet.

### Supplementary Table S4. Cell lines used in this study

| Cell line                                  | Laboratory                                                                           | Reference            |
|--------------------------------------------|--------------------------------------------------------------------------------------|----------------------|
| J-Lat 10.6                                 | Eric Verdin                                                                          | Jordan et al., 2003  |
| J-Lat 6.3                                  | Eric Verdin                                                                          | Jordan et al., 2003  |
| J-Lat 8.4                                  | Eric Verdin                                                                          | Jordan et al., 2003  |
| J-Lat 9.2                                  | Eric Verdin                                                                          | Jordan et al., 2003  |
| J-Lat 15.4                                 | Eric Verdin                                                                          | Jordan et al., 2003  |
| J-Lat E4                                   | Jonathan Karn                                                                        | Pearson et al., 2008 |
| PBMCs and resting CD4 <sup>+</sup> T cells | Purified from blood of healthy donors obtained from Gulf Coast Regional Blood Center | Not applicable       |

### Supplementary Table S5. Small compounds used in this study

| Compound               | Function                  | Source               | Catalogue number |
|------------------------|---------------------------|----------------------|------------------|
| TNF- $\alpha$          | NF- $\kappa$ B activator  | Sigma                | T6674            |
| SCH772984              | ERK inhibitor             | Selleck Chemical LLC | S7101            |
| PD325901               | MEK inhibitor             | Selleck Chemical LLC | S1036            |
| (+)-JQ1                | Bromo domain inhibitor    | APExBio              | A1910            |
| SAHA                   | Pan-HDAC inhibitor        | APExBio              | A4084            |
| Ionomycin              | Calcium ionophore         | Sigma                | I0634            |
| PMA                    | PKC agonist               | Sigma                | P8139            |
| Ingenol 320-dibenzoate | PKC agonist               | Enzo Life Sciences   | BML-PE186        |
| Menadione              | ROS inducer               | Sigma                | M5625            |
| Raltegravir (ART)      | HIV-1 Integrase inhibitor | HIV Reagent Program  | ARP-11680        |
| SMORE library          | This study                |                      |                  |

### Supplementary Table S6. siRNAs used in this study

| Target gene          | Company / Catalogue number | Sequence (5'-3')       |
|----------------------|----------------------------|------------------------|
| Non-targeting (NT)   | QIAGEN/ 1027280            | Proprietary            |
| Human c-Fos          | QIAGEN/ SI02781464         | TGGGTTTCATTATTGCAATTAA |
| Human c-Jun          | QIAGEN/ SI00300580         | AAGAACGTGACAGATGAGCAG  |
| Human HIF-1 $\alpha$ | QIAGEN/ SI02664431         | AGCCATTACATAATATAGAA   |

**Supplementary Table S7. DNA oligonucleotides used in this study**

| <b>Amplicon</b>               | <b>Primer Number / Sequence (5'-3')</b>                              | <b>Assay</b> |
|-------------------------------|----------------------------------------------------------------------|--------------|
| HIV-1 US (P1/P2)              | 1518/TTCT TCAGAGCAGACCAGAGC<br>1519/GCTGCCAAAGAGTGATCTGA             | RT-qPCR      |
| HIV-1 SS (P0/P6)              | 1506/AAAGCTTGCCTTGAGTG CTTCA<br>1508/TATAGGTTGCATTACATGTAC           | RT-qPCR      |
| HIV-1MS (P0/P8)               | 1506/AAAGCTTGCCTTGAGTG CTTCA<br>1507/GATTGGGAGGTGGGTTGCTTTG          | RT-qPCR      |
| HIV-1 3'-end (VQA)            | 1452/CAGATGCTGCATATAAGCAGCTG<br>1453/TTTTTTTTTTTTTTTTTTTTTTGAAGCAC   | RT-qPCR      |
| HIV-1 Read through            | 1550/CAGATGCTGCATATAAGCAGCTG<br>1551/CACAACAGACGGGCACACAC            | RT-qPCR      |
| HIV-1 +141<br>5'-LTR specific | 1111/GCTTAAGCCTCAATAAAGCTTGCCTTGAG<br>1112/GTCCTGCGTCGAGAGATCTCCTCTG | ChIP-qPCR    |
| <i>JUN</i>                    | 856/AGATGAAGTCTTTCTGGCCTGCCT<br>857/ACACTGGGCAGGATACCCAAACAA         | RT-qPCR      |
| <i>HIF1A</i>                  | 3074/AGCTTGCTCATCAGTTGCCA<br>3075/CCAGAAGTTTCCTCACACGC               | RT-qPCR      |
| <i>U6</i>                     | 9/CTCGCTTCGGCAGCACATATAC<br>10/GGAACGCTTCACGAATTTGCGTG               | RT-qPCR      |
| <i>RPL19</i>                  | 354/ATCGATCGCCACATGTATCA<br>355/GCGTGCTTCCTTGGTCTTAG                 | RT-qPCR      |
| <i>FOS</i>                    | 854/ TGACAGATACGCTCCAAGCG<br>855/ TGGCAATCTCGGTCTGCA                 | RT-qPCR      |
| <i>EGR1</i>                   | 3052/ GGCGAGCAGCCCTACG<br>3053/ GCACCTTCTCGTTGTTTCAGAG               | RT-qPCR      |
| <i>MT2A</i>                   | 3056/ CCTCCAAGTCCCAGCGAAC<br>3057/ GAGCAGCAGCTTTTCTTGTCAG            | RT-qPCR      |
| <i>HIST1H2BM</i>              | 2034/GTACAAGGTGCTGAAGCAGGTC<br>2035/ATCTCCCTCGAAGTGATGGTCG           | RT-qPCR      |
| <i>HIST1H2BG</i>              | 2036/CGATACTGGCATCTCATCCAAGG<br>2037/ATCTCCCTGGAGGTAATGGTCG          | RT-qPCR      |
| <i>HIST1H3J</i>               | 2040/TCCGCAAAGTGCATTTTCAGCG<br>2041/GGCGTGAATAGCACAGAGGTTG           | RT-qPCR      |

**Supplementary Table S8. Antibodies used in western blot and ChIP assays**

| <b>Target</b>                                | <b>Company</b> | <b>Catalogue Number</b> | <b>Assay (Dilution used)</b> |
|----------------------------------------------|----------------|-------------------------|------------------------------|
| Anti-actin rhodamine                         | Bio-Rad        | 12004163                | Western blot (1:10000)       |
| $\beta$ -actin (C-4, mouse monoclonal)       | Santa Cruz     | sc-47778                | Western blot (1:10000)       |
| JNK (2C6, mouse monoclonal)                  | Cell Signaling | 3708                    | Western blot (1:1000)        |
| T183/Y185 phospho-JNK (G9, mouse monoclonal) | Cell Signaling | 9255                    | Western blot (1:2000)        |

|                                                     |                |         |                                                                                              |
|-----------------------------------------------------|----------------|---------|----------------------------------------------------------------------------------------------|
| ERK1/2 (L34F12, mouse monoclonal)                   | Cell Signaling | 4696    | Western blot (1:2000)                                                                        |
| T202/T204 phospho-ERK1/2 (20G11, rabbit monoclonal) | Cell Signaling | 4376    | Western blot (1:1000)                                                                        |
| p38 (D13E1, rabbit monoclonal)                      | Cell Signaling | 8690    | Western blot (1:1000)                                                                        |
| T180/Y182 phospho-p38 (3D7, rabbit monoclonal)      | Cell Signaling | 9215    | Western blot (1:1000)                                                                        |
| c-Jun (60A8, rabbit monoclonal)                     | Cell Signaling | 9165    | Western blot (1:1000)<br>ChIP (2 $\mu$ g/10x10 <sup>6</sup> cells)<br>40 $\mu$ l = 2 $\mu$ g |
| S63 phospho-Jun (mouse monoclonal)                  | Santa Cruz     | sc-822  | Western blot (1:2000)                                                                        |
| T91 phospho-Jun (Rabbit monoclonal EPR2236)         | Abcam          | Ab79756 | Western blot (1:2000)                                                                        |
| Fos (9F6, rabbit monoclonal)                        | Cell Signaling | 2250    | Western blot (1:1000)<br>ChIP (2 $\mu$ g/10x10 <sup>6</sup> cells)<br>40 $\mu$ l = 2 $\mu$ g |
| T232 phospho-Fos (rabbit polyclonal)                | Abcam          | Ab43175 | Western blot (1:4000)                                                                        |
| Elk-1 (Rabbit polyclonal)                           | Cell Signaling | 9182    | Western blot (1:1000)                                                                        |
| S383 phospho-Elk-1 (Rabbit polyclonal)              | Cell Signaling | 9181    | Western blot (1:1000)                                                                        |
| HIF-1 $\alpha$ Clone tr4 (mouse)                    | BD Biosciences | 610969  | Western blot (1:1000)<br>ChIP (2.5 $\mu$ g/10x10 <sup>6</sup> cells)                         |
| Normal IgG (Rabbit polyclonal)                      | Millipore      | 12-360  | ChIP (2 $\mu$ g/10x10 <sup>6</sup> cells)                                                    |
